# Supplementary material for: STING Agonist-Induced Skin Inflammation Is Exacerbated with Prior Systemic Innate Immune Activation
Source: Int J Mol Sci. 2023 Feb 18;24(4):4128. doi: 10.3390/ijms24044128 (PMC9960435; doi:10.3390/ijms24044128)
Supplement: Supplementary file 1 [file ijms-24-04128-s001.zip › Supplementary Table S1.xlsx]

## Sheet: DE results 
	COMMON UPREGULATED GENES							COMMON DOWNREGULATED GENES							UNIQUELY UPREGULATED						UNIQUELY DOWNREGULATED
	diABZI vs control		poly(I:C)+ diABZI vs control					diABZI vs control		poly(I:C)+ diABZI vs control					diABZI vs control		poly(I:C)+ diABZI vs control				diABZI vs control		poly(I:C)+ diABZI vs control
Probe	Log2 fold change	p value	Log2 fold change	p value			Probe	Log2 fold change	p value	Log2 fold change	p value			Probe	Log2 fold change	p value	Log2 fold change	p value		Probe	Log2 fold change	p value	Log2 fold change	p value
Cxcl3	7.97	0.000211	7.69	5.66e-05			Rhoa	-0.259	0.0167	-0.26	0.0202			Csf2	2.36	0.0139				Shc1	-0.176	0.0131
Ccl4	7.9	0.000264	8.31	4.21e-05			Mapk14	-0.325	0.0323	-0.362	0.00995			Mapkapk5	1.11	0.0326				Tgfb3	-0.775	0.00464
Oasl1	7.38	2.87e-05	7.16	3.4e-06			Nr3c1	-0.338	0.0112	-0.563	0.00192			Nod2	0.648	0.0171				Mef2c_Mm	-0.803	0.0372
Ccl5	7.32	0.000126	7.24	4.42e-06			Map3k1	-0.405	0.0156	-0.445	0.0219			Hif1a	0.545	0.0418				Ppp1r12b	-0.852	0.0424
Ccl3	7.03	0.000208	7.68	3.35e-05			Tcf4	-0.432	0.0199	-0.54	0.000889			Myl2			3.04	0.00311		Ccr4	-2.63	0.00235
Cxcl10	6.92	6.89e-05	6.55	4.82e-05			Jun	-0.435	0.0401	-0.413	0.0102			Kng1			2.44	0.00136		Rac1			-0.26	0.00885
Cxcl2	6.74	0.00198	6.75	0.000629			Ptk2	-0.443	0.0106	-0.588	0.00204			Alox15			2.24	0.0152		Tlr5			-0.352	0.0395
Chi3l3	6.56	6.28e-05	6.22	0.00012			Gnaq	-0.47	0.0117	-0.433	0.0034			Il1r1			0.319	0.0398		Elk1			-0.482	0.04
Ifit3	6.39	6.68e-05	6.04	1.02e-05			Raf1	-0.475	0.000978	-0.755	0.000635			Mef2d			0.201	0.0312		Smad7			-0.504	0.0219
Ifit1	6.35	0.000211	6.43	5.38e-05			Mapk8	-0.492	0.00857	-0.493	0.00223									Rps6ka5			-0.607	0.00604
Ifi44	6.29	7.91e-05	6.14	1.77e-05			Atf2	-0.578	0.00388	-0.89	1.38e-05									Twist2			-0.74	0.0103
Hsh2d	6.15	0.000426	6.13	0.000113			Bcl6	-0.579	0.0104	-0.44	0.0129									H2-Ea-ps			-0.749	0.0345
Ifit2	6.11	7.92e-05	5.82	2.25e-05			Myc	-0.608	0.00737	-0.744	0.000731									Cd55			-0.866	0.02
Irf7	6.03	0.000154	6.04	1.41e-05			Ptger4	-0.614	0.00394	-0.687	0.00383									Il23r			-0.92	0.0278
Fasl	5.95	0.00101	6.36	0.000218			Map3k5	-0.63	0.0191	-0.922	0.00122									Ccl19			-1.08	0.00118
Nos2	5.89	0.000811	5.87	4.71e-05			Creb1	-0.666	0.0211	-0.528	0.0302									Fxyd2			-1.46	0.0257
Mx2	5.64	0.000112	5.48	4.53e-05			Nfatc3	-0.686	0.000528	-0.749	0.000122									Ccl20			-1.73	0.00196
Ccl2	5.6	7.18e-05	5.27	1.65e-05			Mapk1	-0.69	0.000132	-0.736	0.00133									C6			-1.97	0.0292
Ccl7	5.33	8.53e-05	4.96	8.59e-06			Ripk2	-0.703	0.00458	-0.878	0.00059									Cd163			-2.07	0.00698
Ccr1	5.16	0.000332	5.15	0.00011			H2-Eb1	-0.77	0.049	-0.776	0.012									Ccl21a			-2.51	0.00469
Il6	5.11	0.00246	3.97	0.00165			Tollip	-0.807	0.000513	-0.76	0.00107									Cfd			-2.65	0.00385
Csf3	4.9	0.000165	4.92	1.53e-05			Mapk3	-0.825	0.000584	-0.772	0.00742									Ccl24			-2.84	0.00015
Nlrp3	4.88	0.000102	4.79	1.46e-05			Map3k7	-0.85	0.000353	-0.902	1.1e-06
Oas1a	4.84	8.98e-05	4.89	4.66e-06			Hmgb2	-0.869	0.0335	-0.973	0.0186
Il1b	4.84	0.000594	4.53	0.000219			Prkca	-0.9	0.0213	-0.915	0.0182
Ptgs2	4.78	0.000866	4.59	0.000297			Masp2	-0.984	0.0449	-0.834	0.0325
Cxcl5	4.78	0.0261	4.71	0.0142			Hdac4	-1.02	0.000193	-0.862	0.0246
Cfb	4.69	0.000155	4.41	2.68e-05			Map2k4	-1.11	0.000387	-1.17	2.31e-05
Tlr9	4.63	7.21e-05	4.84	4.47e-06			Ptgfr	-1.12	0.0106	-0.738	0.0116
C3ar1	4.59	3.84e-05	4.37	1.14e-06			Il7	-1.13	0.00917	-1.9	0.00221
Oas2	4.54	5.77e-05	4.51	7.48e-06			Tbxa2r	-1.17	0.00973	-1.32	0.00107
Cxcl1	4.49	0.000418	4.29	0.000117			Ccl22	-1.18	0.0143	-1.47	0.0115
Mx1	4.41	6.48e-05	4.33	8.65e-05			Tgfb2	-1.22	8.72e-05	-1.08	2.5e-05
Cxcl9	4.34	0.00064	4.12	0.000307			Pdgfa	-1.31	0.000912	-1.35	0.000142
Ifnb1	4.3	0.00319	4.11	0.000735			Hmgb1	-1.37	0.000463	-1.52	6.26e-07
Il11	4.25	0.00193	3.65	0.000179			Hspb1	-1.47	0.00188	-1.26	2.14e-05
Tlr1	3.6	3.77e-05	3.51	1.39e-06			Hmgn1	-1.78	0.00299	-1.76	3.78e-05
Tlr7	3.54	0.000155	3.53	3.57e-05			Hras1	-1.81	0.000196	-1.99	0.000526
Ifi27l2a	3.51	0.000464	3.22	0.000144			Map2k6	-1.89	0.000171	-1.65	1.18e-05
Cd40	3.51	0.000745	3.29	0.000341			Ptgs1	-1.97	0.00493	-2.06	0.000523
Tnf	3.46	0.000233	3.75	0.000116			Ptger3	-2.1	0.0108	-2.59	7.62e-05
Iigp1	3.39	0.000443	2.97	0.0002			Il22ra2	-2.65	0.0292	-2.82	0.00375
Ptger2	3.34	7.45e-05	2.95	5.57e-06			Retnla	-3.25	0.049	-5.93	0.00121
Il10	3.34	0.000926	3.55	0.00017			Alox12	-3.63	0.000573	-2.76	0.000596
Cxcr1	3.33	0.00329	3.42	0.00142
Tlr3	3.15	0.000872	3.14	0.00025
Tlr2	3.14	2.76e-05	3.03	3.29e-06
Ccl11	3.13	0.000368	2.86	5.21e-05
Tlr8	3.12	0.000218	3.08	3.06e-05
Il18rap	3.09	3.48e-05	3.23	5.21e-05
Itgb2	3.07	3.26e-05	2.82	8.2e-07
Cxcr2	3.04	0.00313	3.29	0.00084
C3	3.02	0.000859	2.49	0.000156
Trem2	2.96	0.00037	2.81	4.43e-05
Tyrobp	2.81	4.61e-05	2.61	1.87e-06
Il15	2.74	0.00108	2.38	0.000976
Stat2	2.71	0.000751	2.8	6.7e-05
Ccr2	2.7	0.000128	2.57	1.38e-05
Tlr6	2.64	9.68e-05	2.76	4.15e-05
Ccr7	2.64	0.00254	2.12	0.00162
Mmp9	2.51	0.00259	2.85	0.00101
Tlr4	2.45	0.000471	2.25	0.000279
Mmp3	2.41	0.00295	2.21	0.00177
Ltb	2.4	0.00126	1.86	0.000263
Stat1	2.38	0.00103	2.34	0.000199
Il23a	2.34	0.0432	2.46	0.00564
Irf5	2.28	0.00032	2.07	1.43e-05
C2	2.27	0.000889	2	4.26e-05
Daxx	2.25	0.00191	1.94	0.0009
Arg1	2.21	3.19e-05	2.2	3.28e-05
Il12a	2.19	0.00282	1.85	0.0138
Tnfaip3	2.1	0.000589	2.08	0.000326
Ccr3	2.04	0.01	3.14	0.000721
Irf1	1.98	0.00104	1.73	0.000647
Cd86	1.96	0.00131	1.76	0.000522
Cd4	1.94	0.00325	1.74	0.00376
Cysltr1	1.93	0.000168	1.73	1.62e-05
Il10rb	1.85	0.000282	1.69	7.45e-05
Tnfsf14	1.83	0.00169	2.07	0.000518
Cxcr4	1.79	3.44e-05	1.74	6.33e-06
Cysltr2	1.79	0.00262	1.71	0.0024
C1qa	1.69	0.00497	1.61	0.00263
C4a	1.64	0.00334	1.15	0.00847
C1qb	1.6	0.00498	1.33	0.00288
Flt1	1.57	0.000273	1.36	0.000118
Ly96	1.55	0.000417	1.26	0.000989
Ddit3	1.52	0.00219	1.52	0.00112
Myd88	1.5	0.000919	1.53	7.34e-05
Ptgir	1.37	0.000642	1.02	0.000559
Csf1	1.36	0.0016	1.36	0.00586
C1s	1.33	0.00199	0.96	0.00441
Ccl8	1.23	0.0133	1.16	0.00199
C1ra	1.1	0.00194	0.688	0.00505
Tgfb1	0.97	0.000133	0.841	6.34e-05
Ltb4r1	0.956	0.0127	0.873	0.000687
Rapgef2	0.923	0.0252	0.728	0.0292
Plcb1	0.914	0.00792	0.659	9.99e-05
Il1rn	0.886	0.00682	0.981	0.024
Map2k1	0.798	0.0122	0.811	0.00228
Relb	0.732	0.00438	0.56	0.0109
Mafk	0.679	0.0241	0.764	0.00295
Grb2	0.581	0.00322	0.533	0.00413
Bcl2l1	0.557	0.0118	0.558	0.00357
Mknk1	0.533	0.00728	0.323	0.0333
Mapkapk2	0.526	0.00894	0.366	0.0121
Cfl1	0.459	0.0119	0.324	0.0117
Stat3	0.446	0.0125	0.426	0.00321
Nfe2l2	0.426	0.00892	0.436	0.0146
Cdc42	0.313	0.0458	0.222	0.0472
